# Supplementary material
Source: PubMed Central journal article supplement (PMC3271752)

Supplementary material for manuscript “Dissecting plant genomes with the PLAZA comparative genomics platform”

Michiel Van Bel<sup>1,2+</sup>, Sebastian Proost<sup>1,2+</sup>, Elisabeth Wischnitzki<sup>1,2</sup>, Sara Mohavedi<sup>1,2</sup>, Christopher Scheerlinck<sup>3</sup>, Yves Van de Peer<sup>1,2</sup> and Klaas Vandepoele<sup>1,2,\*</sup>

<sup>1</sup>Department of Plant Systems Biology, VIB, Technologiepark 927, B-9052 Ghent, Belgium,

<sup>2</sup>Department of Plant Biotechnology and Bioinformatics, Ghent University, Technologiepark 927, B-9052 Ghent, Belgium and

<sup>3</sup>Department Industrial Sciences BME-CTL, University College Ghent, Ghent University Association, Schoonmeersstraat 52, B-9000 Ghent, Belgium

\*To whom correspondence should be addressed. Tel: +32 9 3313822; Fax +32 9 3313809; Email: [klaas.vandepoele@psb.vib-ugent.be](mailto:klaas.vandepoele@psb.vib-ugent.be)

<sup>+</sup>The authors wish it to be known that, in their opinion, the first two authors should be regarded as joint First Authors.

**Supplementary Table 1. Gene and gene family data content for PLAZA 2.5**

| Species                           | Genes   | Coding genes | RNA genes | Pseudo genes | Transposons | GO (1)  | Interpro (2) | Genes in non-singleton gf | Genes in multi-species gf |
|-----------------------------------|---------|--------------|-----------|--------------|-------------|---------|--------------|---------------------------|---------------------------|
| <i>Lotus japonicus</i>            | 69,647  | 43,146       | 45        | 0            | 26,456      | 19,770  | 24,738       | 25,716                    | 25,174                    |
| <i>Medicago truncatula</i>        | 57,587  | 45,197       | 776       | 0            | 11,614      | 17,836  | 21,999       | 38,494                    | 30,844                    |
| <i>Glycine max</i>                | 46,509  | 46,464       | 45        | 0            | 0           | 32,616  | 38,517       | 45,982                    | 45,652                    |
| <i>Malus domestica</i>            | 95,230  | 63,546       | 0         | 0            | 31,684      | 47,889  | 44,063       | 58,790                    | 55,288                    |
| <i>Fragaria vesca</i>             | 34,809  | 34,809       | 0         | 0            | 0           | 17,053  | 21,388       | 30,833                    | 26,756                    |
| <i>Manihot esculenta</i>          | 30,800  | 30,748       | 52        | 0            | 0           | 20,434  | 24,222       | 30,132                    | 29,965                    |
| <i>Ricinus communis</i>           | 31,221  | 31,221       | 0         | 0            | 0           | 16,901  | 20,285       | 24,455                    | 23,315                    |
| <i>Populus trichocarpa</i>        | 41,521  | 41,476       | 45        | 0            | 0           | 25,633  | 30,585       | 37,777                    | 36,847                    |
| <i>Arabidopsis thaliana</i>       | 33,602  | 27,416       | 1,359     | 924          | 3,903       | 22,874  | 21,467       | 26,118                    | 25,932                    |
| <i>Arabidopsis lyrata</i>         | 32,670  | 32,670       | 0         | 0            | 0           | 21,429  | 23,557       | 30,870                    | 29,264                    |
| <i>Carica papaya</i>              | 28,072  | 28,027       | 45        | 0            | 0           | 13,914  | 16,265       | 22,531                    | 21,005                    |
| <i>Theobroma cacao</i>            | 46,269  | 28,882       | 45        | 0            | 17,342      | 16,653  | 20,039       | 27,575                    | 25,306                    |
| <i>Vitis vinifera</i>             | 26,644  | 26,504       | 88        | 52           | 0           | 20,244  | 19,035       | 23,268                    | 22,682                    |
| <i>Oryza sativa ssp. japonica</i> | 57,874  | 42,211       | 92        | 0            | 15,571      | 26,014  | 24,735       | 37,391                    | 37,020                    |
| <i>Oryza sativa ssp. indica</i>   | 59,430  | 49,202       | 39        | 0            | 10,189      | 26,518  | 29,345       | 44,310                    | 43,609                    |
| <i>Brachypodium distachyon</i>    | 26,678  | 26,632       | 46        | 0            | 0           | 17,805  | 20,832       | 25,687                    | 25,256                    |
| <i>Sorghum bicolor</i>            | 34,686  | 34,609       | 77        | 0            | 0           | 21,502  | 24,601       | 31,921                    | 31,384                    |
| <i>Zea mays</i>                   | 39,597  | 39,190       | 0         | 323          | 84          | 21,926  | 25,700       | 35,221                    | 32,528                    |
| <i>Selaginella moellendorffii</i> | 22,285  | 22,285       | 0         | 0            | 0           | 12,417  | 15,995       | 17,392                    | 13,783                    |
| <i>Physcomitrella patens</i>      | 36,137  | 28,097       | 72        | 0            | 7,968       | 14,283  | 16,275       | 21,287                    | 17,787                    |
| <i>Ostreococcus lucimarinus</i>   | 7,805   | 7,805        | 0         | 0            | 0           | 4,737   | 5,807        | 7,408                     | 7,340                     |
| <i>Ostreococcus tauri</i>         | 8,116   | 7,994        | 122       | 0            | 0           | 3,966   | 5,094        | 6,797                     | 6,663                     |
| <i>Micromonas sp. RCC299</i>      | 10,276  | 10,204       | 72        | 0            | 0           | 5,953   | 7,120        | 8,144                     | 7,872                     |
| <i>Volvox carteri</i>             | 15,544  | 15,544       | 0         | 0            | 0           | 6,082   | 8,410        | 13,782                    | 12,041                    |
| <i>Chlamydomonas reinhardtii</i>  | 16,841  | 16,788       | 53        | 0            | 0           | 8,509   | 8,973        | 13,666                    | 11,796                    |
| Total                             | 909,850 | 780,667      | 3,073     | 1,299        | 124,811     | 462,958 | 519,047      | 685,547                   | 645,109                   |

(1) # genes with at least one GO term

(2) # genes with at least one InterPro domain

**Supplementary Table 2. List of rosid core gene families.**

See file [core\\_families\\_rosids.xlsx](#)

**Supplementary Table 3. List of monocot core gene families.**

See file [core\\_families\\_monocots.xlsx](#)

**Supplementary Table 4. List of green plant core gene families.**

See file [core\\_families\\_greenplants.xlsx](#)

**Supplementary Table 5. Species-specific gene families.**

Number of species-specific gene families (and associated genes), including singletons. The lowest counts are indicated in light grey whereas the highest counts are in dark grey.

| Species                           | Gene families | Genes   |
|-----------------------------------|---------------|---------|
| <i>Arabidopsis lyrata</i>         | 2,206         | 3,406   |
| <i>Arabidopsis thaliana</i>       | 1,362         | 1,484   |
| <i>Brachypodium distachyon</i>    | 1,078         | 1,376   |
| <i>Carica papaya</i>              | 5,865         | 7,022   |
| <i>Chlamydomonas reinhardtii</i>  | 3,562         | 4,992   |
| <i>Fragaria vesca</i>             | 4,867         | 8,053   |
| <i>Glycine max</i>                | 616           | 812     |
| <i>Lotus japonicus</i>            | 17,540        | 17,972  |
| <i>Malus domestica</i>            | 5,760         | 8,258   |
| <i>Manihot esculenta</i>          | 662           | 783     |
| <i>Medicago truncatula</i>        | 8,417         | 14,353  |
| <i>Micromonas sp. RCC299</i>      | 2,162         | 2,332   |
| <i>Oryza sativa ssp. indica</i>   | 5,154         | 5,593   |
| <i>Oryza sativa ssp. japonica</i> | 4,963         | 5,191   |
| <i>Ostreococcus lucimarinus</i>   | 424           | 465     |
| <i>Ostreococcus tauri</i>         | 1,240         | 1,331   |
| <i>Physcomitrella patens</i>      | 7,687         | 10,310  |
| <i>Populus trichocarpa</i>        | 3,983         | 4,629   |
| <i>Ricinus communis</i>           | 7,186         | 7,906   |
| <i>Selaginella moellendorffii</i> | 5,662         | 8,502   |
| <i>Sorghum bicolor</i>            | 2,802         | 3,225   |
| <i>Theobroma cacao</i>            | 1,546         | 3,576   |
| <i>Vitis vinifera</i>             | 3,431         | 3,822   |
| <i>Volvox carteri</i>             | 2,034         | 3,503   |
| <i>Zea mays</i>                   | 4,855         | 6,662   |
| Sum                               | 105,064       | 135,558 |

**Supplementary Table 6. Clade-specific gene families.**

Number of clade-specific families (and associated genes). The lowest counts are indicated in light grey whereas the highest counts are in dark grey. The third column is the normalized number of genes (by taking the number of species in the phylogenetic clade into account).

| Clade             | Species | Gene families | Genes   | Normalized genes |
|-------------------|---------|---------------|---------|------------------|
| Arabidopsis       | 2       | 1,289         | 5,416   | 2,708            |
| Chlamydomonadales | 2       | 2,332         | 8,491   | 4,246            |
| Euphorbiaceae     | 2       | 121           | 451     | 226              |
| Galegoids         | 2       | 43            | 702     | 351              |
| Oryza             | 2       | 5,197         | 14,433  | 7,217            |
| Ostreococcus      | 2       | 795           | 1,783   | 892              |
| PACCMADClade      | 2       | 302           | 935     | 468              |
| Rosaceae          | 2       | 139           | 1,098   | 549              |
| BEPClade          | 3       | 152           | 801     | 267              |
| Brassicales       | 3       | 12            | 60      | 20               |
| Malpighiales      | 3       | 48            | 219     | 73               |
| Mamiellales       | 3       | 947           | 3,332   | 1,111            |
| Papilionoideae    | 3       | 36            | 460     | 153              |
| Malvids           | 4       | 1             | 4       | 1                |
| Chlorophyta       | 5       | 134           | 958     | 192              |
| Monocots          | 5       | 711           | 8,855   | 1,771            |
| N2FixingClade     | 5       | 0             | 0       | 0                |
| Fabids            | 8       | 1             | 15      | 2                |
| Rosids            | 12      | 47            | 1,605   | 134              |
| Eudicots          | 13      | 85            | 3,185   | 245              |
| Angiosperms       | 18      | 202           | 15,105  | 839              |
| VascularPlants    | 19      | 102           | 7,851   | 413              |
| LandPlants        | 20      | 534           | 78,976  | 3,949            |
| GreenPlants       | 25      | 1,116         | 200,837 | 8,033            |
| Sum               |         | 143,46        | 355,572 |                  |

**Supplementary Figure 1. Gene family coverage by GO enrichment, organized by gene family size.**

Cumulative gene coverage is the combined sum of all genes that are in a gene family with GO enrichment.

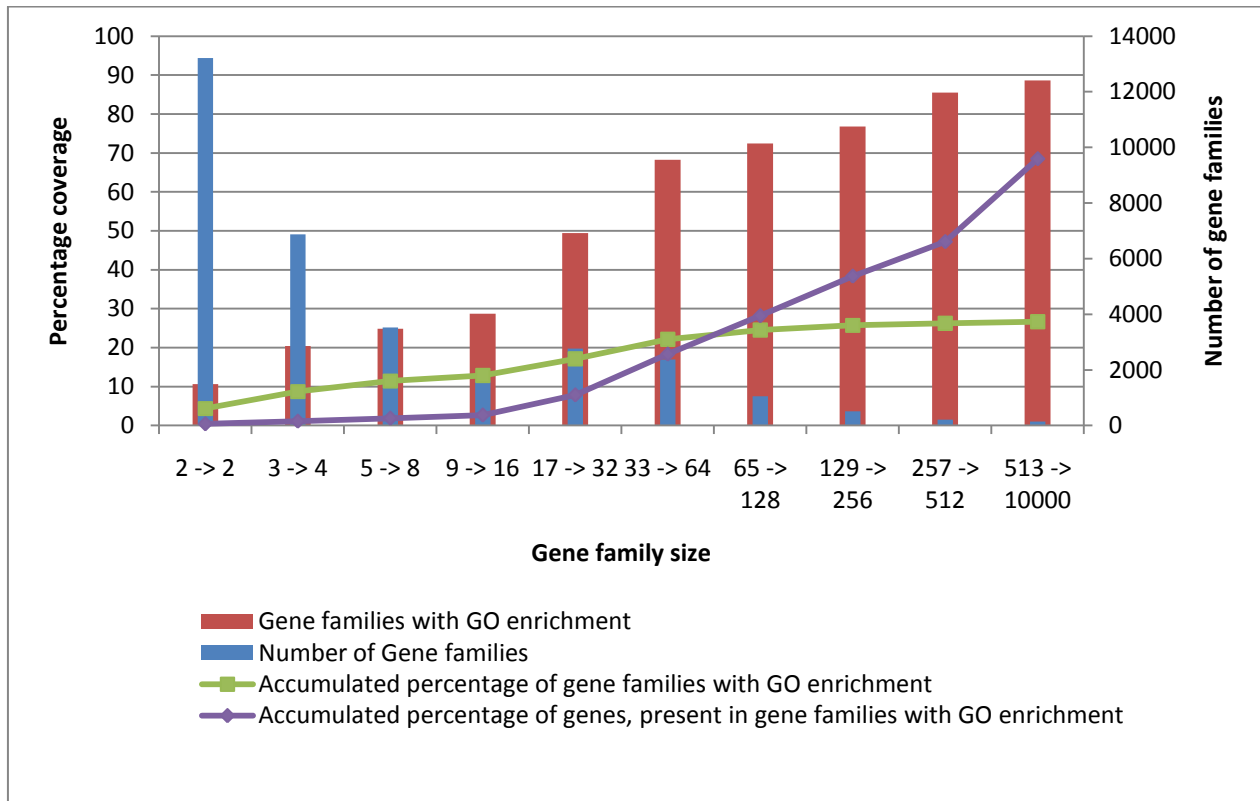

## Supplementary Figure 2. Core gene family coverage.

Core gene family coverage in all PLAZA organisms, using the 6,316 rosid (A), 7,076 monocot (B), and 2,928 green plant core gene families (C). Coverage is expressed as percentage of the core gene families having the indicated organism. Data are based on Supplementary Tables S2, S3, and S4 for A, B, and C, respectively.

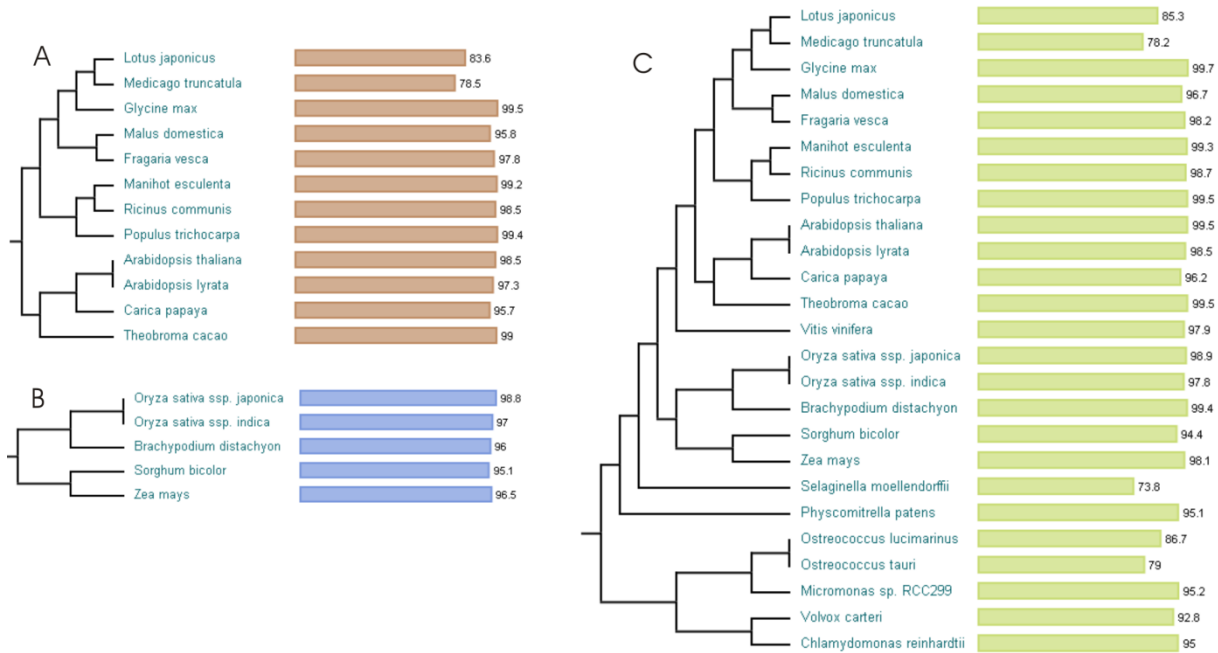

### Supplementary Figure 3. Gene family Expansion Plot.

(A) The gene copy number in *Vitis vinifera* and *Glycine max*, within each gene family, is indicated by the position of a dot, whereas the color indicates the number of gene families with these gene copy numbers. (B) Density plot between two sets of organisms, Brassicales (*Arabidopsis thaliana*, *Arabidopsis lyrata*, and *Carica papaya*) versus Malpighiales (*Manihot esculenta*, *Ricinus communis*, and *Populus trichocarpa*).

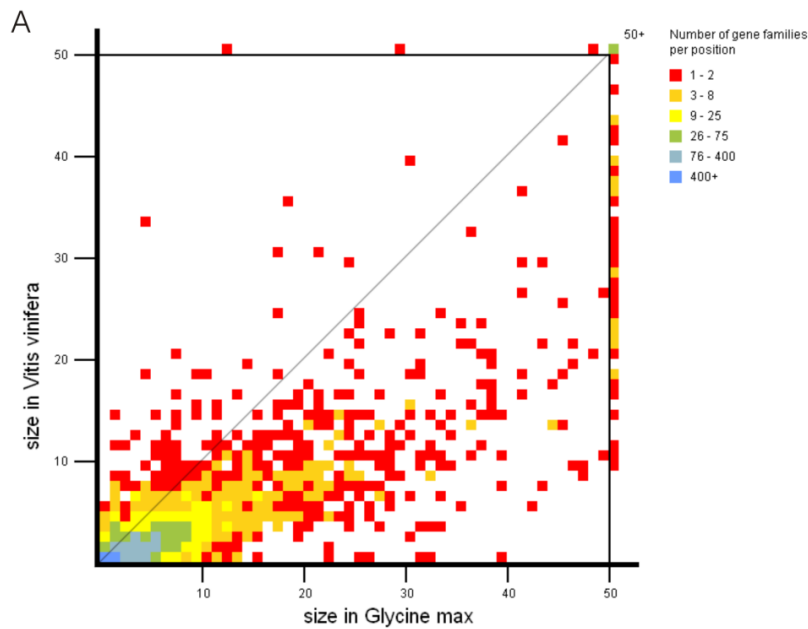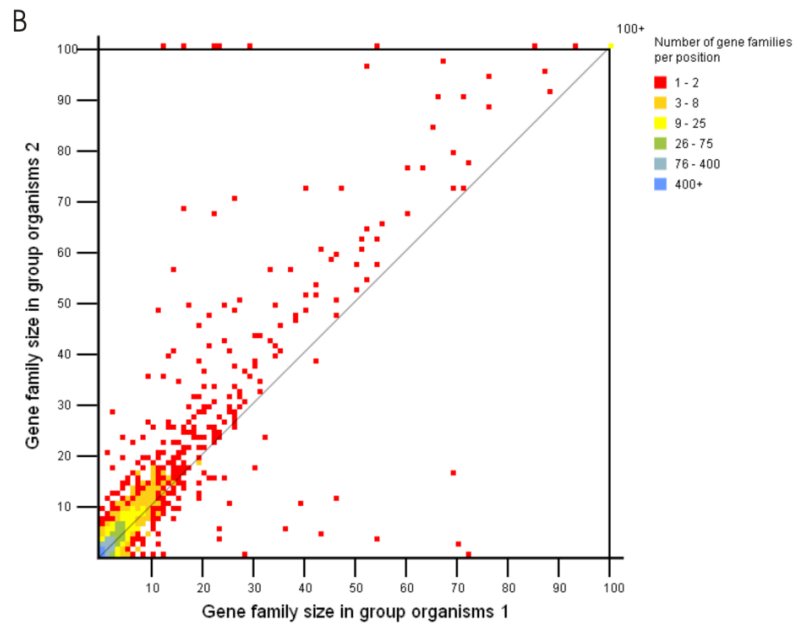

Organisms 1 : *Arabidopsis thaliana*, *Arabidopsis lyrata*, *Carica papaya*

Organisms 2 : *Manihot esculenta*, *Ricinus communis*, *Populus trichocarpa*



### Supplementary Figure 4. Summary functional clusters.

(A) Number of detected functional clusters per species with associated average gene cluster size.  
 (B) Number of detected functional clusters per species with number of genes with at least one GO term and number of genes in large scaffolds. Species are ordered according to the PLAZA phylogenetic tree.

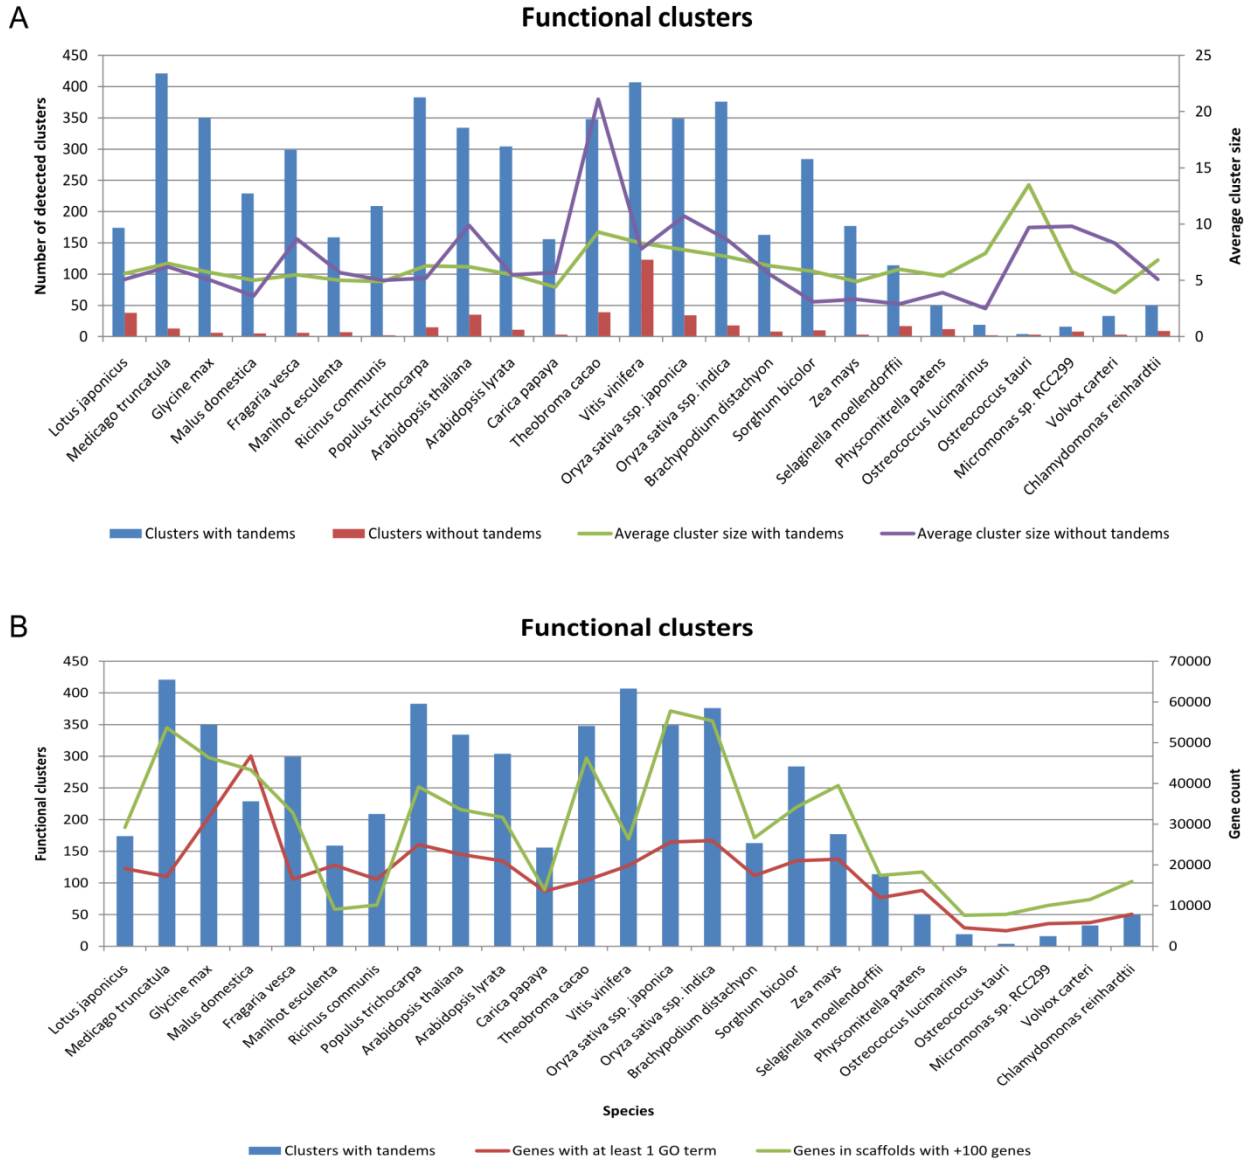

### Supplementary Figure 5. Circle Plot.

Plot showing colinear regions within *Arabidopsis thaliana* (inner circle) and between *Arabidopsis thaliana* and *Arabidopsis lyrata* (colored border of circle, indicating different *Arabidopsis lyrata* chromosomes). Also displayed are the coding gene density (grey blocks on the border of the circle) and a selected GO term (GO:0005198) (blue stripes on border of the circle). Coloring of colinear regions within *Arabidopsis thaliana* is based on start/end chromosomes, and only those colinear regions (both intra- and inter-species) with a Ks-value between 0.3 and 2 (corresponding with 3R duplication event) are shown.

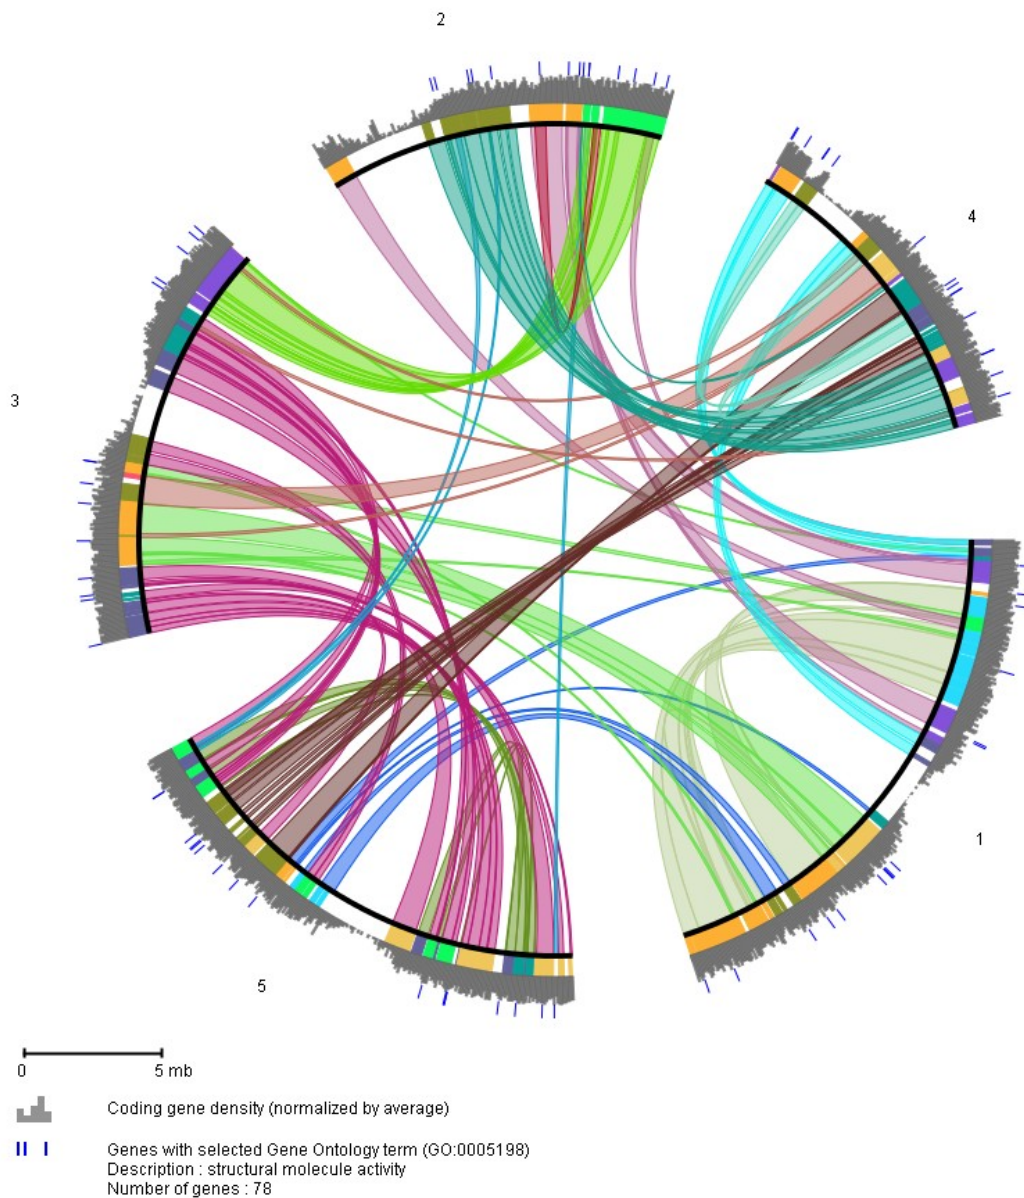

## Supplementary Figure 6. Gene Ontology enrichment graph.

GO enrichment graph for a set of *Arabidopsis thaliana* genes that are differentially expressed under drought stress conditions. The enlarged rectangle depicting additional information about the enriched functional category, is shown when hovering over the image with the mouse pointer.

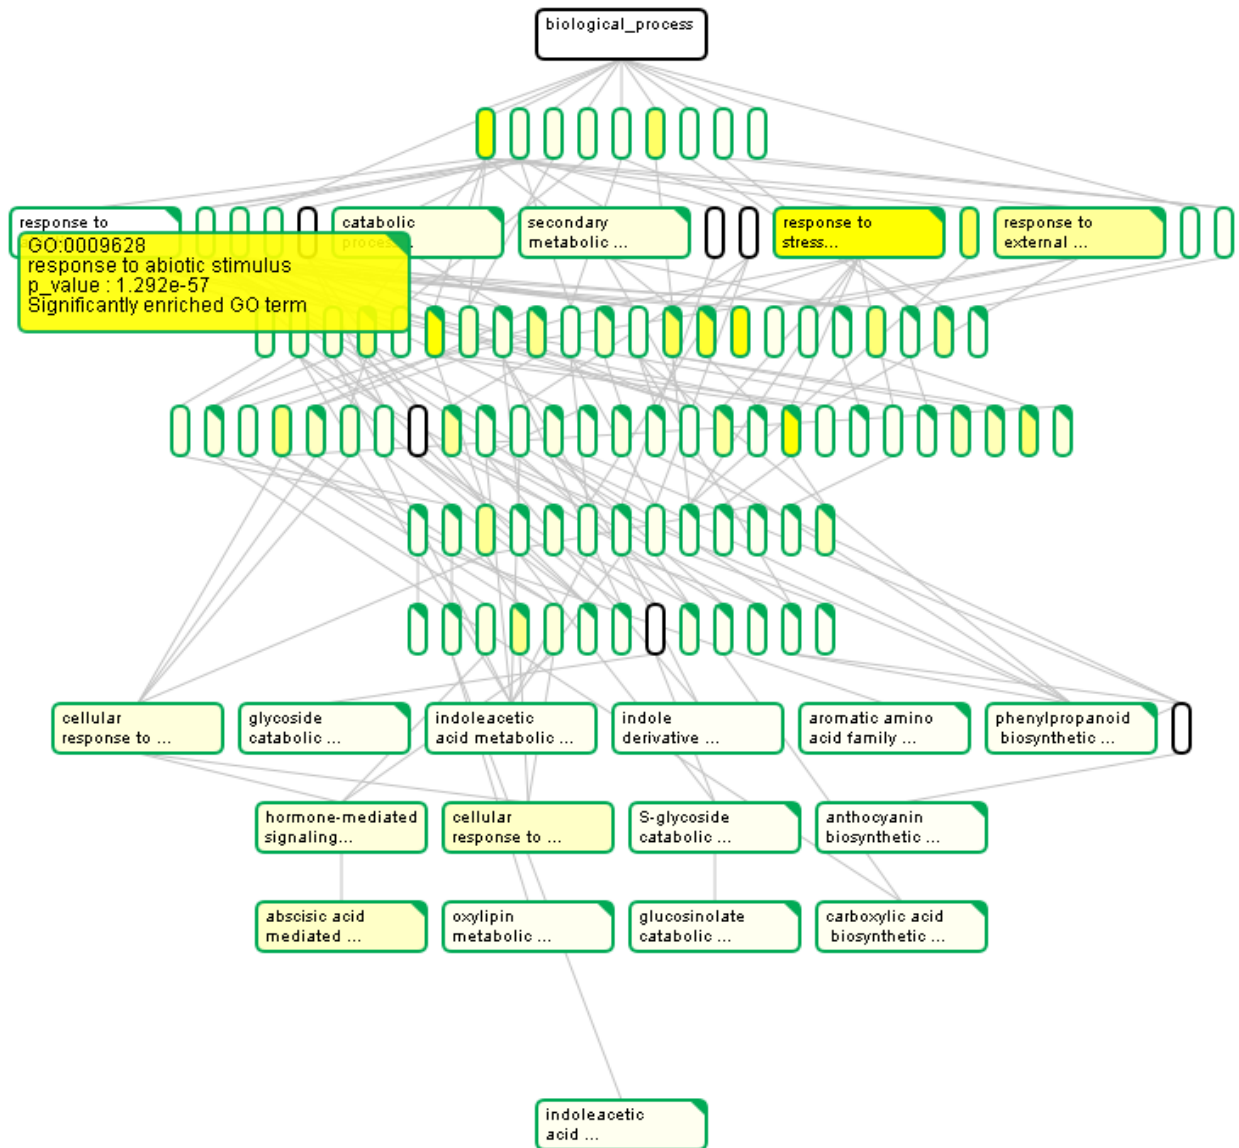

PLAZA GO ENRICHMENT. <http://bioinformatics.psb.ugent.be/plaza>

- █ Enriched GO term
- █ Depleted GO term
- █ Neither enriched or depleted GO term
- █ Enriched GO term (partially redundant)
- █ Depleted GO term (partially redundant)

Enrichment =  $-\log(p\text{-value})$  :

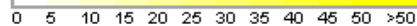

### Supplementary Method 1. Selection of core gene families.

Detection of phylogenetic clades for which core gene families can be selected (A). Red branches indicate problematic subclades for which no core gene families can be determined because of the presence of a single species (leaves). (B) Indication of when the presence of a gene family gene within a phylogenetic clade that is accepted as contributing to the core gene family for that clade.

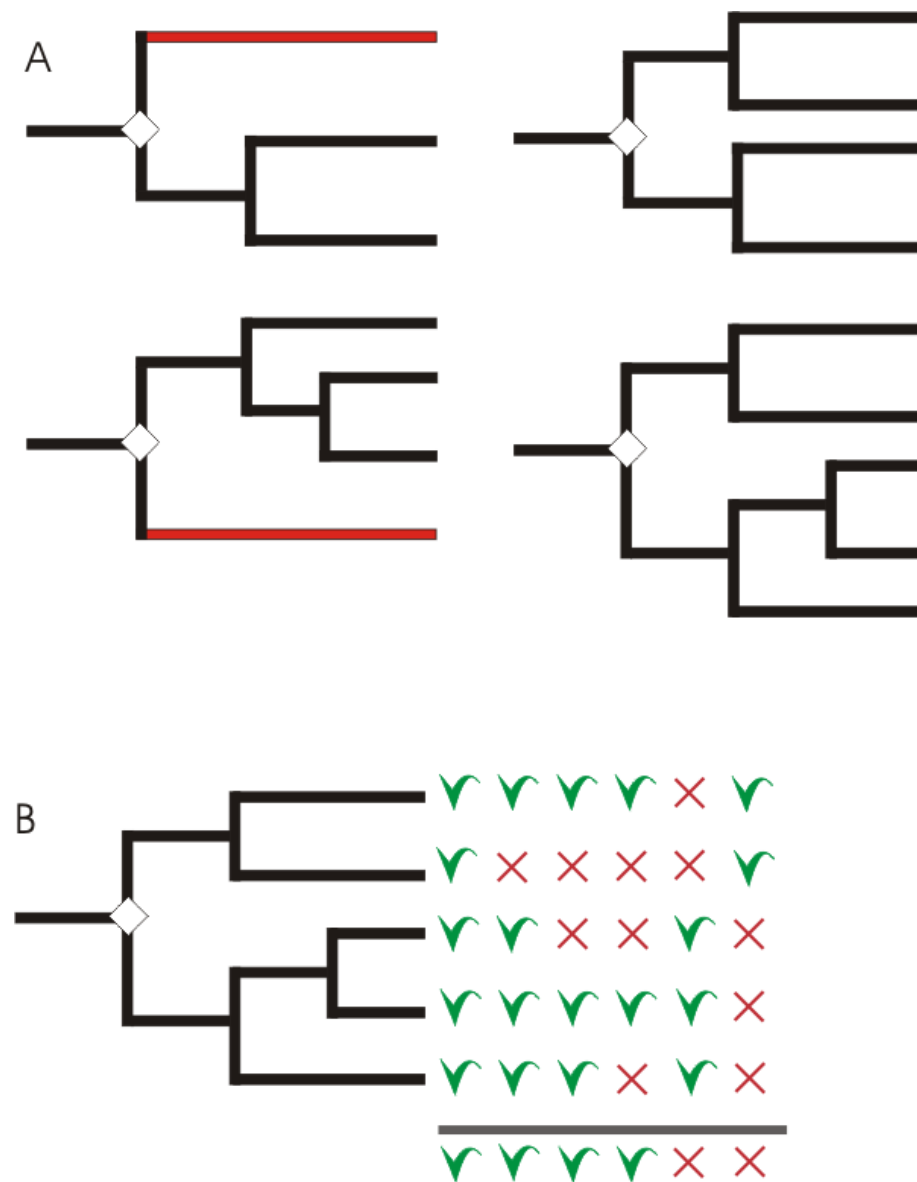

## Supplementary Method 2. Different strategies for the Integrative Orthology detection.

Red Circles indicate the orthology prediction retained by a specific selection strategy. Majority-voting is a simple concept in which, per query gene, only those orthologous relations are kept that have the maximum of supporting orthologous types.

(A) The first strategy requires at least one type of orthology support, possibly leading to an overestimation of the number of orthologs. (B) The second strategy requires at least two types of orthology support. (C) The third strategy requires at least two types of orthology support, but with majority voting. (D) The fourth strategy requires at least three types of orthology support. (E) The fifth strategy requires at least three types of orthology support, but with majority voting.

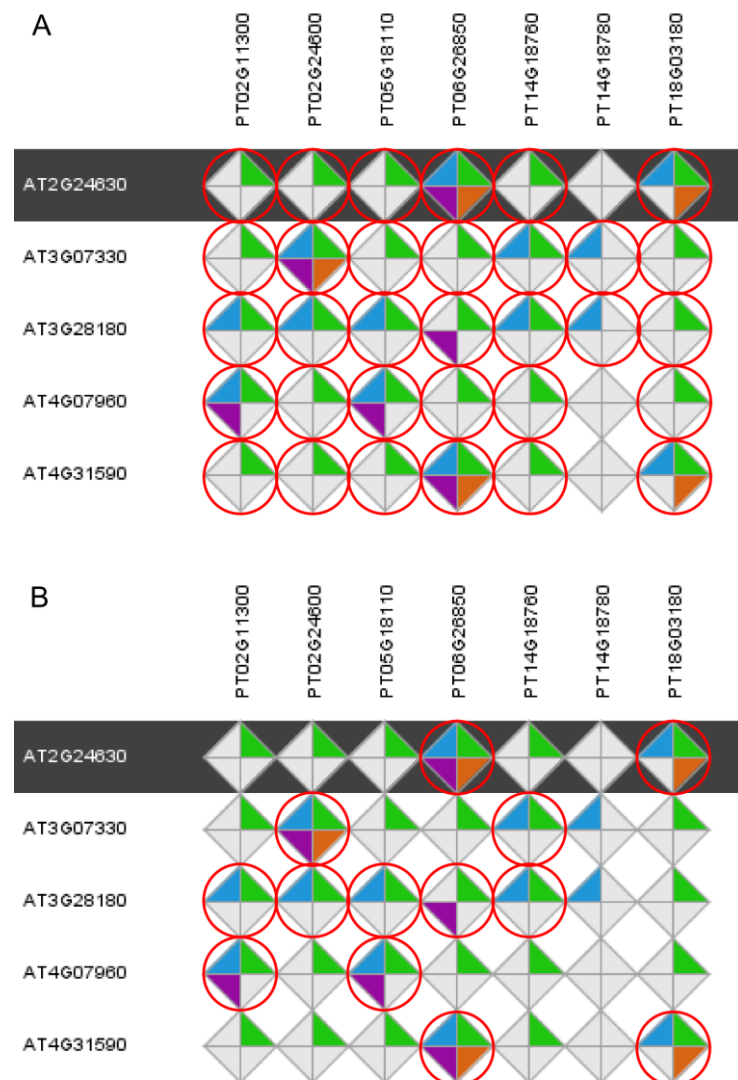

C

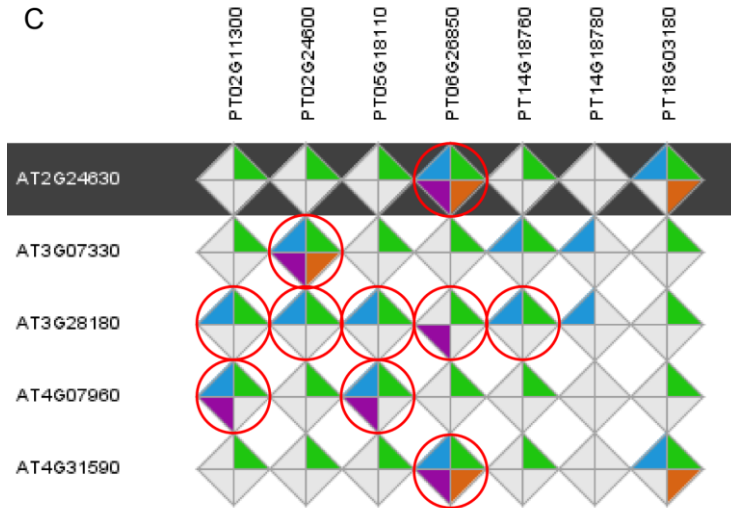

D

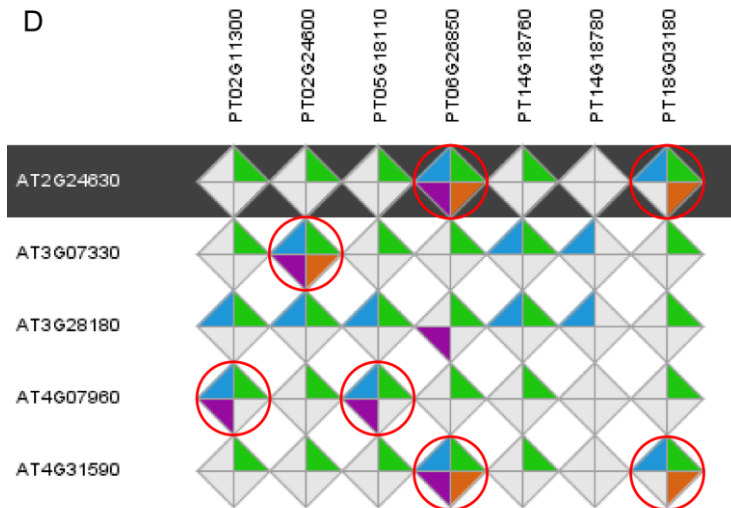

E

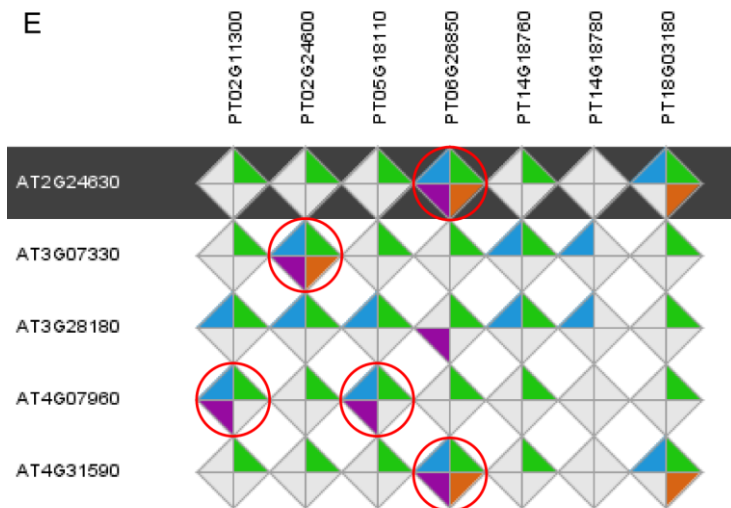

Supplement: supp_pp.111.189514_189514PLAZA_2.5_supplementary_data.pdf [file supp_pp.111.189514_189514PLAZA_2.5_supplementary_data.pdf]
